# Supplementary material for: Brachial Artery Responses to Ambient Pollution, Temperature, and Humidity in People with Type 2 Diabetes: A Repeated-Measures Study
Source: PubMed Central journal article supplement (PMC3948021; doi:10.1289/ehp.1206136), 2014-01-07
Supplement: ehp.1206136.s001.pdf [file ehp.1206136.s001.pdf]

**Supplemental Material**  
**Brachial Artery Responses to Ambient Pollution,  
Temperature, and Humidity in People with Type 2  
Diabetes: A Repeated-Measures Study**

Antonella Zanobetti, Heike Luttmann-Gibson, Edward S. Horton, Allison Cohen, Brent A. Coull,  
Barbara Hoffmann, Joel D. Schwartz, Murray A. Mittleman, Yongsheng Li, Peter H. Stone,  
Celine de Souza, Brooke Lamparello, Petros Koutrakis, and Diane R. Gold

**Table of Contents**

|                                  |        |
|----------------------------------|--------|
| Supplemental Material, Table S1  | page 2 |
| Supplemental Material, Figure S1 | page 3 |
| Supplemental Material, Figure S2 | page 4 |
| Supplemental Material, Figure S3 | page 5 |

**Supplemental Material, Table S1.** Correlations among the pollutants and meteorological variables.

|                                                             | Ambient PM <sub>2.5</sub> (µg/m <sup>3</sup> ) | Indoor continuous PM <sub>2.5</sub> (µg/m <sup>3</sup> ) | Home/trip integrated PM <sub>2.5</sub> (µg/m <sup>3</sup> ) | Ambient BC (µg/m <sup>3</sup> ) | Home/trip integrated BC (µg/m <sup>3</sup> ) | OC (µg/m <sup>3</sup> ) | EC (µg/m <sup>3</sup> ) | PN (1000/cm <sup>3</sup> ) | SO <sub>4</sub> (µg/m <sup>3</sup> ) | CO (ppm) | NO <sub>2</sub> (ppm) | O <sub>3</sub> (ppm) | Temperature (°C) | Water vapor pressure (hPa) |
|-------------------------------------------------------------|------------------------------------------------|----------------------------------------------------------|-------------------------------------------------------------|---------------------------------|----------------------------------------------|-------------------------|-------------------------|----------------------------|--------------------------------------|----------|-----------------------|----------------------|------------------|----------------------------|
| Ambient PM <sub>2.5</sub> (µg/m <sup>3</sup> )              | 1                                              | 0.39                                                     | 0.12                                                        | 0.65                            | 0.08                                         | 0.54                    | 0.55                    | -0.16                      | 0.76                                 | 0.34     | 0.35                  | 0.36                 | 0.32             | 0.42                       |
| Indoor continuous PM <sub>2.5</sub> (µg/m <sup>3</sup> )    |                                                | 1                                                        | 0.44                                                        | 0.42                            | 0.14                                         | 0.24                    | 0.32                    | 0.05                       | 0.47                                 | 0.34     | 0.27                  | 0.00                 | 0.11             | 0.19                       |
| Home/trip integrated PM <sub>2.5</sub> (µg/m <sup>3</sup> ) |                                                |                                                          | 1                                                           | 0.18                            | 0.49                                         | 0.07                    | 0.13                    | 0.11                       | 0.13                                 | 0.10     | 0.18                  | -0.17                | 0.05             | 0.06                       |
| Ambient BC (µg/m <sup>3</sup> )                             |                                                |                                                          |                                                             | 1                               | 0.20                                         | 0.50                    | 0.86                    | 0.05                       | 0.52                                 | 0.52     | 0.53                  | -0.07                | 0.27             | 0.37                       |
| Home/trip integrated BC (µg/m <sup>3</sup> )                |                                                |                                                          |                                                             |                                 | 1                                            | 0.06                    | 0.07                    | 0.16                       | 0.07                                 | 0.07     | 0.21                  | -0.19                | -0.07            | -0.09                      |
| OC (µg/m <sup>3</sup> )                                     |                                                |                                                          |                                                             |                                 |                                              | 1                       | 0.55                    | -0.15                      | 0.43                                 | 0.32     | 0.30                  | 0.26                 | 0.25             | 0.22                       |
| EC (µg/m <sup>3</sup> )                                     |                                                |                                                          |                                                             |                                 |                                              |                         | 1                       | 0.06                       | 0.53                                 | 0.45     | 0.53                  | -0.05                | 0.26             | 0.35                       |
| PN (1000/cm <sup>3</sup> )                                  |                                                |                                                          |                                                             |                                 |                                              |                         |                         | 1                          | -0.27                                | 0.25     | 0.56                  | -0.39                | -0.76            | -0.72                      |
| SO <sub>4</sub> (µg/m <sup>3</sup> )                        |                                                |                                                          |                                                             |                                 |                                              |                         |                         |                            | 1                                    | 0.22     | 0.20                  | 0.33                 | 0.33             | 0.45                       |
| CO (ppm)                                                    |                                                |                                                          |                                                             |                                 |                                              |                         |                         |                            |                                      | 1        | 0.58                  | -0.05                | -0.10            | 0.00                       |
| NO <sub>2</sub> (ppm)                                       |                                                |                                                          |                                                             |                                 |                                              |                         |                         |                            |                                      |          | 1                     | -0.26                | -0.34            | -0.33                      |
| O <sub>3</sub> (ppm)                                        |                                                |                                                          |                                                             |                                 |                                              |                         |                         |                            |                                      |          |                       | 1                    | 0.35             | 0.27                       |
| Temperature (°C)                                            |                                                |                                                          |                                                             |                                 |                                              |                         |                         |                            |                                      |          |                       |                      | 1                | 0.88                       |
| Water vapor pressure (hPa)                                  |                                                |                                                          |                                                             |                                 |                                              |                         |                         |                            |                                      |          |                       |                      |                  | 1                          |

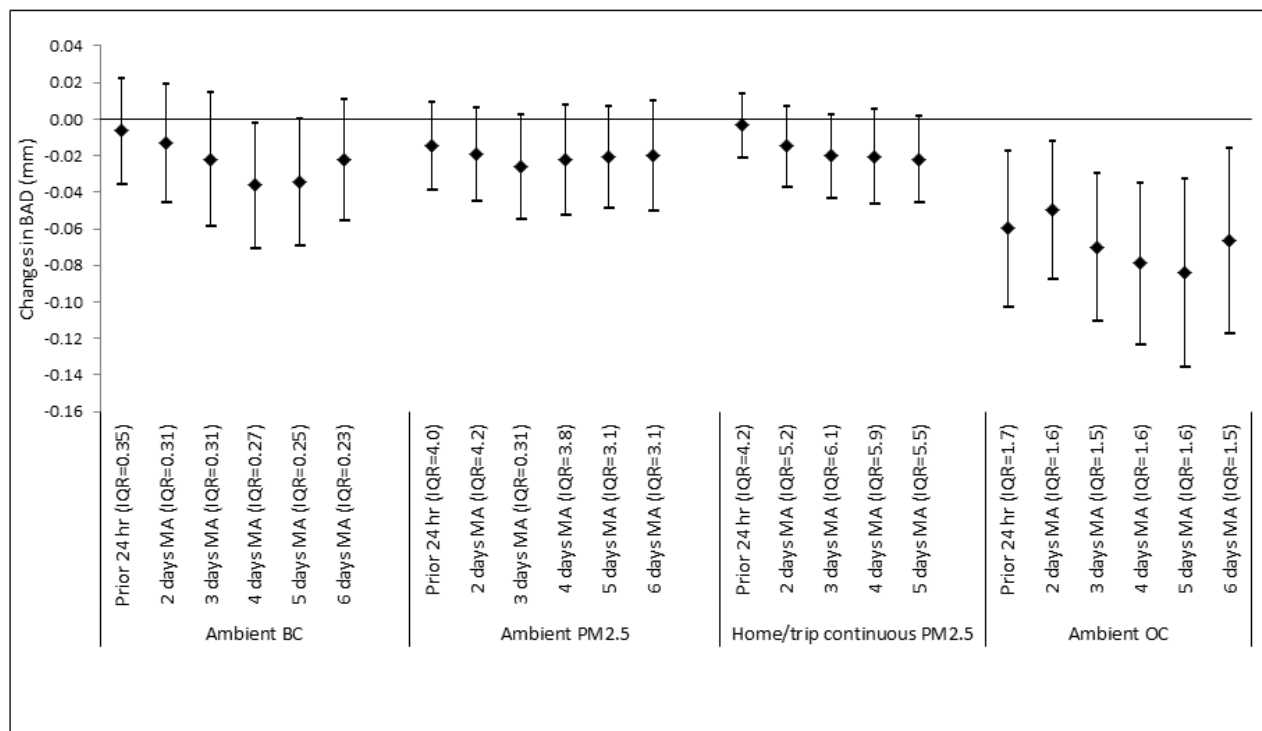

**Supplemental Material, Figure S1.** Change in mm (95% CI) in brachial artery diameter (BAD) before occlusion for an IQR increase in the prior 24 hours and for moving averages (MA) over the 2- to 6-days before the study visit of each pollutant.

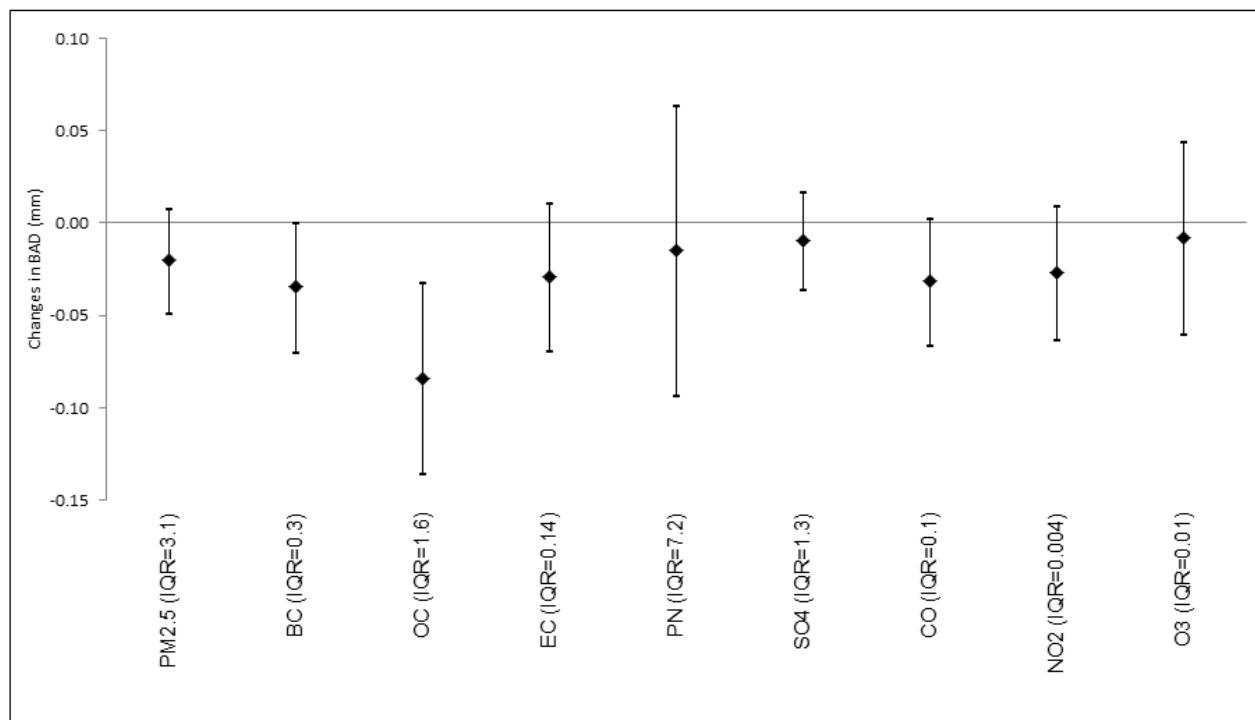

**Supplemental Material, Figure S2.** Change in mm (95% CI) in brachial artery diameter (BAD) before occlusion for IQR increases in 5-day mean concentrations of each pollutant prior to the study visit.

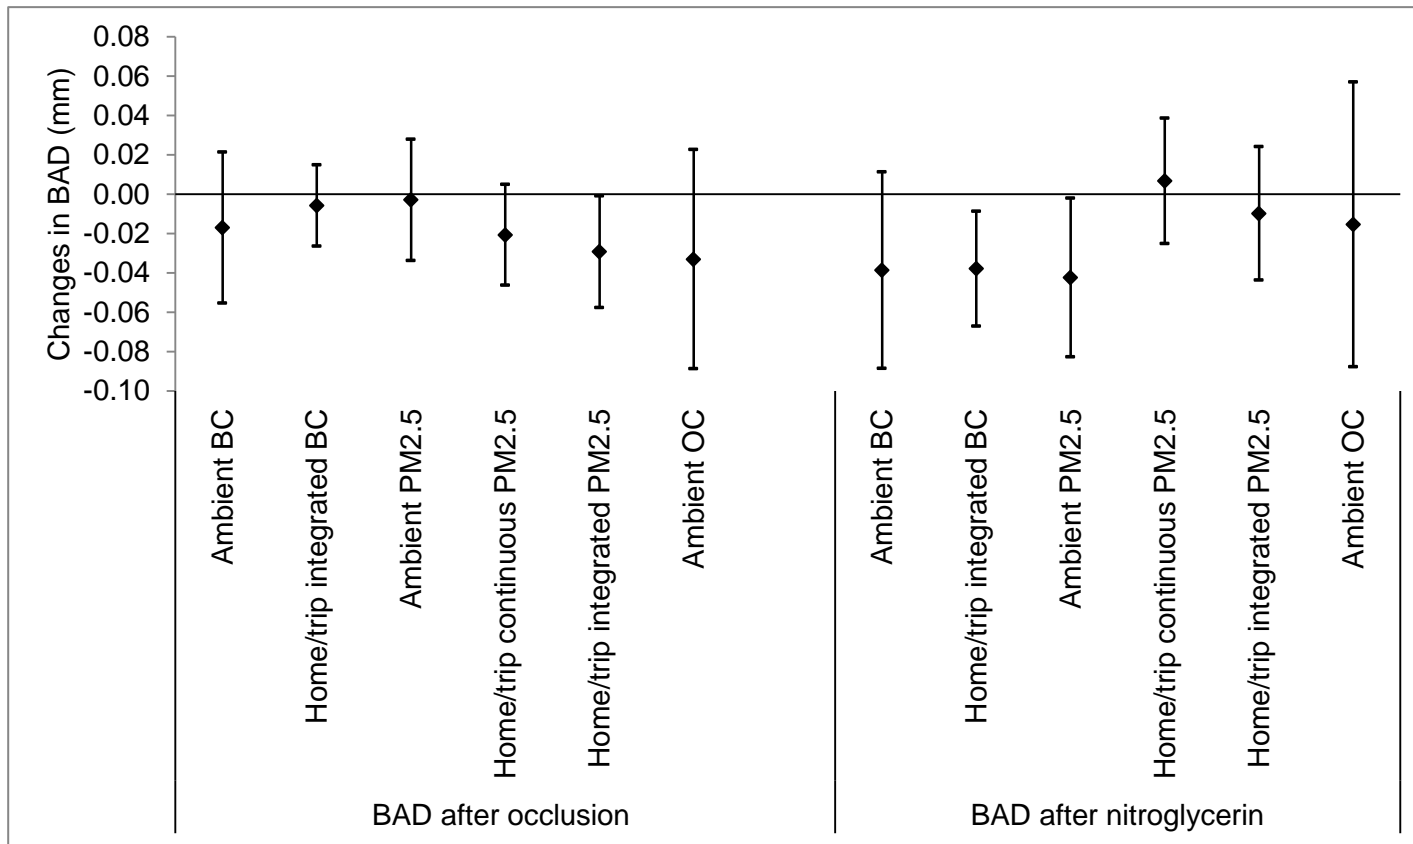

**Supplemental Material, Figure S3.** Change in mm (95% CI) in brachial artery diameter (BAD) after occlusion and after sublingual nitroglycerin for an IQR increase in 5-day mean concentrations of each pollutant prior to the study visit.
